# Supplementary material for: An innovative catalyst design as an efficient electro catalyst and its applications in quantum-dot sensitized solar cells and the oxygen reduction reaction for fuel cells
Source: Royal Society of Chemistry journal article supplement (doi:10.1039/c6nj03510h), 2017-01-01
Supplement: c6nj03510h1.pdf [file c6nj03510h1.pdf]

# Innovative catalyst design as an efficient electro catalyst and its applications in quantum-dot sensitized solar cells and oxygen reduction reaction for fuel cells

**Ikkurthi Kanaka Durga<sup>a</sup>, S. Srinivasa Rao<sup>a</sup>, Dinah Punnoose<sup>a</sup>, Nagabhushanam Kundakarla<sup>b</sup>, Chebrolu Venkata Tulasivarma<sup>a</sup> and Hee-Je Kim<sup>a,\*</sup>**

<sup>a</sup> School of Electrical Engineering, Pusan National University, Busandaehak-ro 63beon-gil, Geumjeong-gu, Busan, 46241, Rep. of KOREA

<sup>b</sup> Department of Chemistry, Marquette University, Milwaukee, Wisconsin 53201, United States

\*Corresponding Author. Tel: +82 51 510 2364. Fax: +82 51 513 0212.

E-mail: [heeje@pusan.ac.kr](mailto:heeje@pusan.ac.kr) (H.-J. Kim).

## Cross-sectional view images

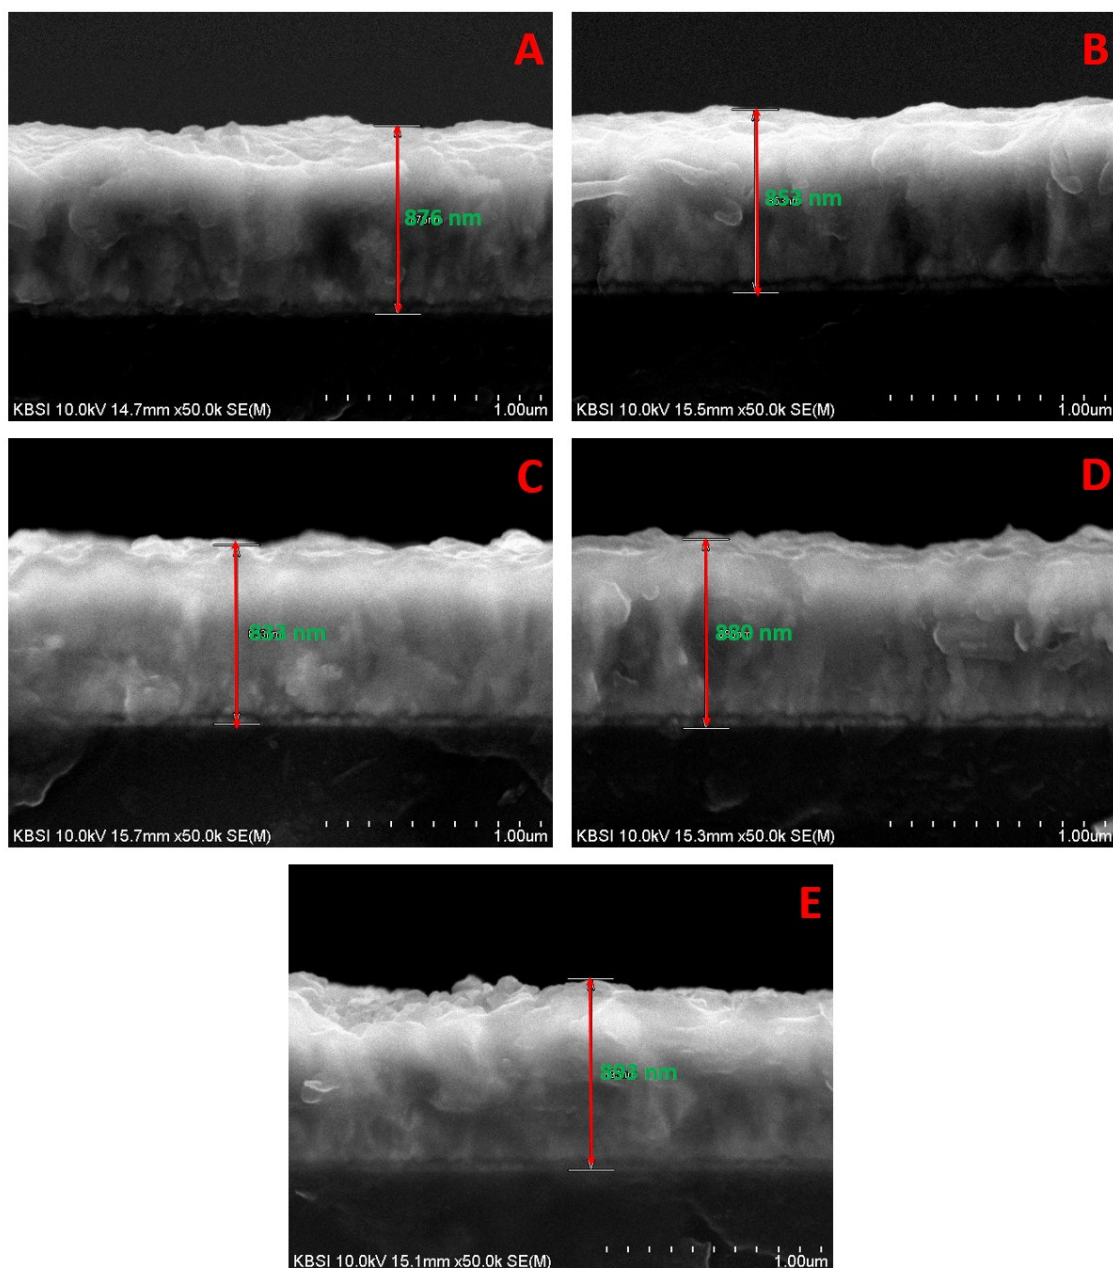

**Fig. S1** Cross-sectional HR-SEM images of (A) Co<sub>100%</sub>Ni<sub>0%</sub>, (B) Co<sub>90%</sub>Ni<sub>10%</sub>, (C) Co<sub>85%</sub>Ni<sub>15%</sub>, (D) Co<sub>65%</sub>Ni<sub>35%</sub> and (E) Co<sub>0%</sub>Ni<sub>100%</sub> thin films deposited on FTO substrate.

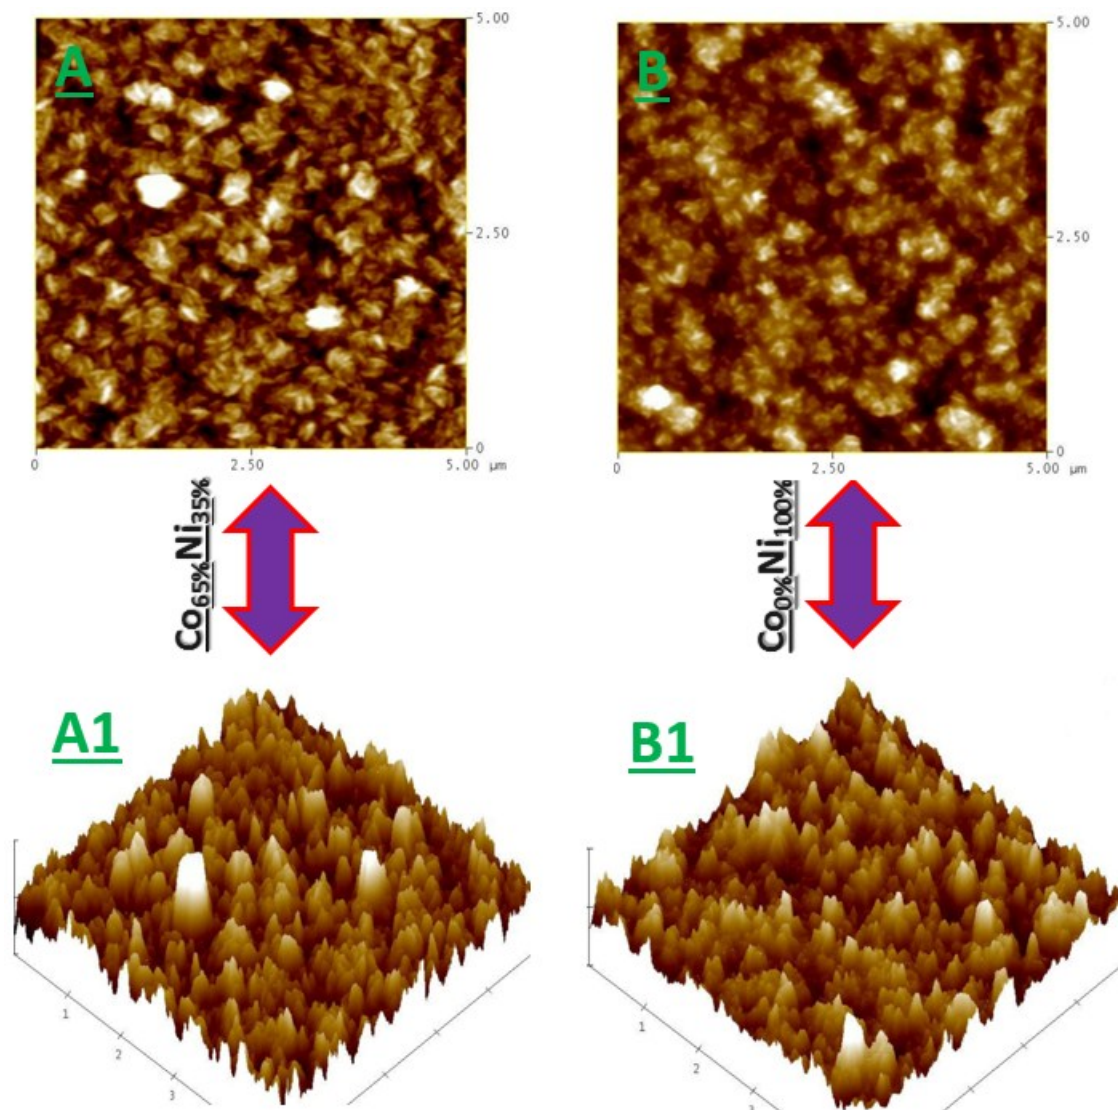

**Fig. S2** 2-Dimensional (2D) and 3-Dimensional (3D) AFM images of the elemental concentration varied thin films on the FTO substrate. (A)  $\text{Co}_{65\%}\text{Ni}_{35\%}$ , and (B)  $\text{Co}_{0\%}\text{Ni}_{100\%}$  CEs, respectively.

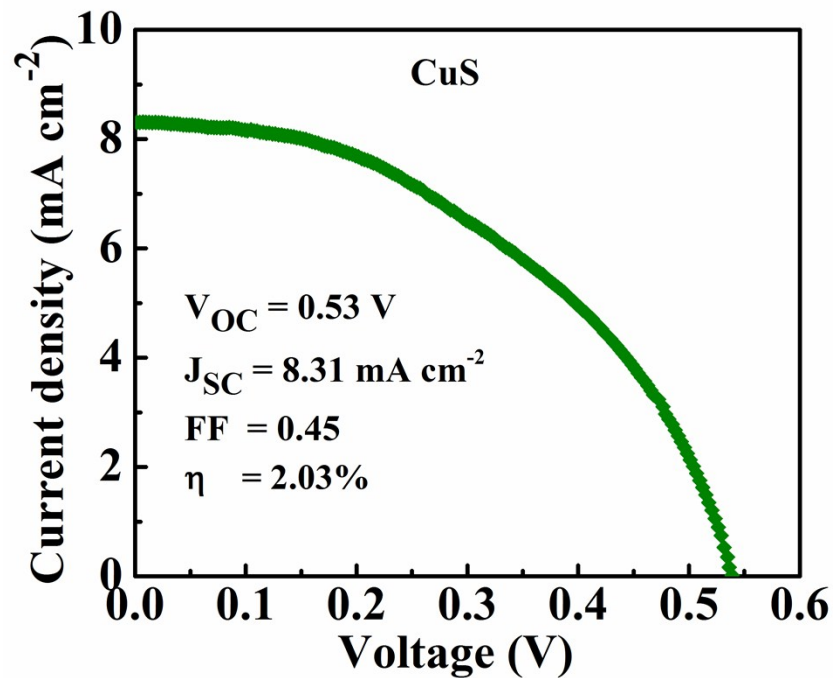

**Fig. S3** J-V curve for the QDSSCs assembled using the CuS CE under simulated solar illumination at 100 mW cm<sup>-2</sup>.

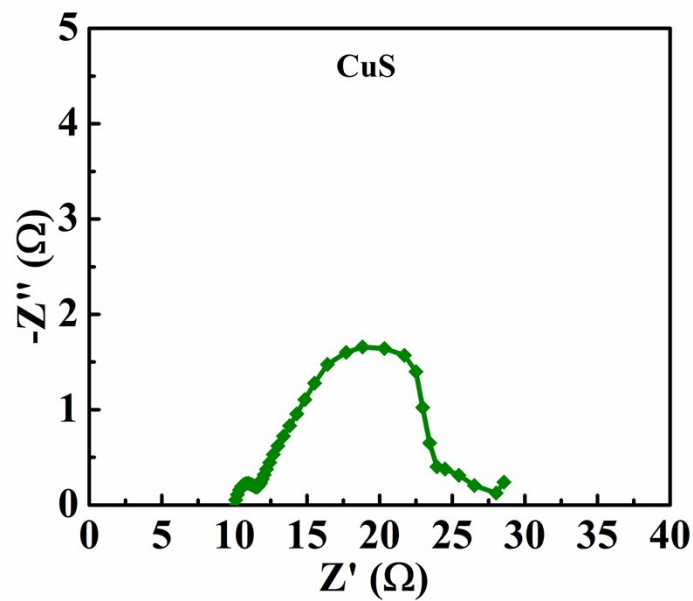

**Fig. S4** Nyquist plot for the QDSSCs assembled using the CuS CE under simulated solar illumination at 100 mW cm<sup>-2</sup>.
